# Supplementary material
Source: PubMed Central journal article supplement (PMC7614792)

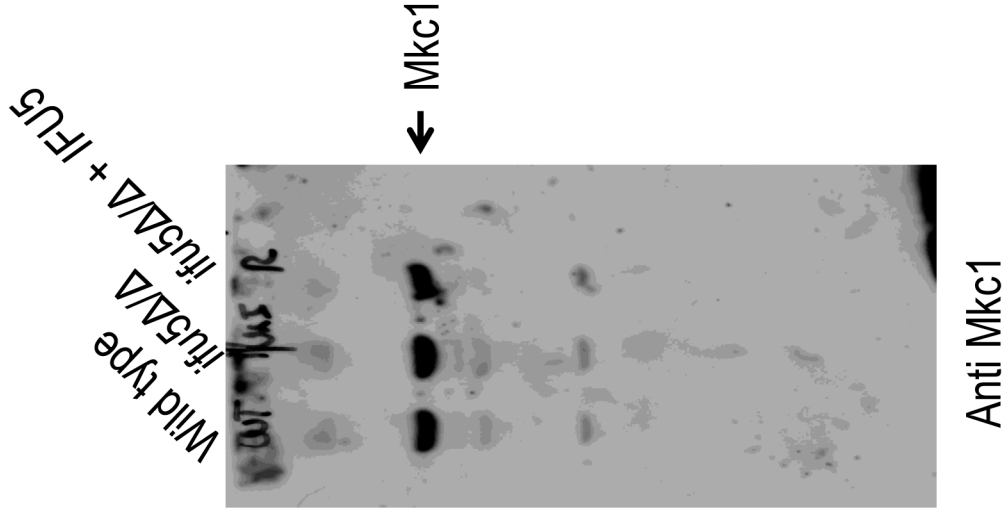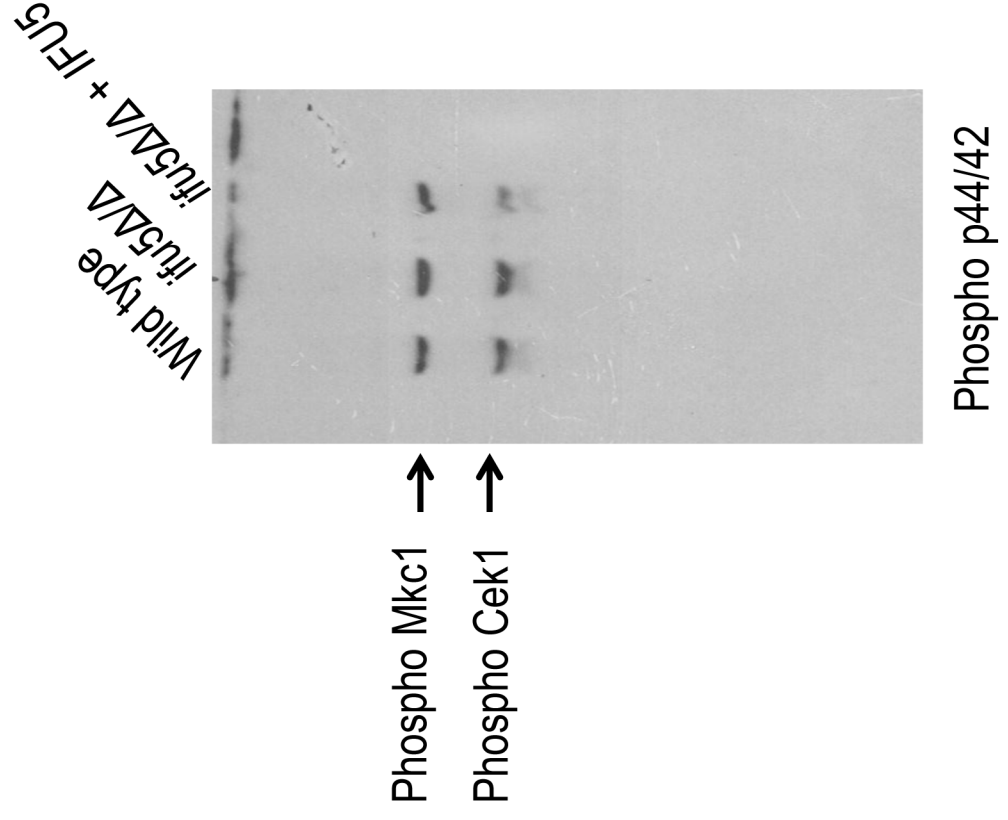

Anti Mkc1

Phospho p44/42

Supplement: EMS178618-supplement-Figure_S4.pdf [file EMS178618-supplement-Figure_S4.pdf]
